# Supplementary material for: Lifestyle approaches to hypertension for prevention of stroke and vascular cognitive impairment: a realist review protocol
Source: PubMed Central journal article supplement — BMJ Open. 2024 Sep 30;14(9):e088631. doi: 10.1136/bmjopen-2024-088631 (PMC11448177; doi:10.1136/bmjopen-2024-088631), 2024-09-30
Supplement: bmjopen-14-9-s002.pdf [file bmjopen-14-9-s002.pdf]

## Appendix 2. OVID Search Strategy

**Performed by:** Joanna Bielecki [joanna.m.bielecki.is.consulting@gmail.com](mailto:joanna.m.bielecki.is.consulting@gmail.com)

**Date of the search:** 27 April 2024

**Database searched:**

- Ovid MEDLINE(R) ALL 1946 - Current
- Ovid Embase Classic+Embase 1947 - Current
- Ovid Healthstar 1966 - Current

**Limits:**

Humans only

Adults only

Most recent 2 yrs of conference abstracts retained in Embase

Opinion publications & clinical trial protocols - removed

Date limit 2000 – Current

English language

**Filters:**

**[Randomized Studies]**

(both MEDLINE and Embase filters have Phase 2-3 - additional terms to supplement RCTs filter) from:

Higgins JPT, Thomas J, Chandler J, Cumpston M, Li T, Page MJ, Welch VA (editors). *Cochrane Handbook for Systematic Reviews of Interventions* version 6.4 (updated August 2023). Cochrane, 2023. Available from [www.training.cochrane.org/handbook](http://www.training.cochrane.org/handbook)

RCT Filter-Cochrane balanced - MEDLINE

2023 revision, Cochrane Handbook. Technical Supplement to Chapter 4, section-3-6-1 Box 3.d Cochrane Highly Sensitive Search Strategy for identifying randomized trials in MEDLINE: sensitivity- and precision-maximizing version (2023 revision); Ovid format <https://training.cochrane.org/handbook/current/chapter-04-technical-supplement-searching-and-selecting-studies#section-3-6-1>

All Clinical Trials - CINAHL. In: CADTH Search Filters Database. Ottawa: CADTH; 2024: <https://searchfilters.cadth.ca/link/104>. Accessed 2024-04-13.

**[Observational & NRS Filters]**

Furlan AD, Irvin E, Bombardier C. [Limited search strategies were effective in finding relevant nonrandomized studies](#). *J Clin Epidemiol*. 2006;59(12):1303-11

Fraser C, Murray A, Burr J. [Identifying observational studies of surgical interventions in MEDLINE and EMBASE](#). *BMC Med Res Methodol*. 2006;6(41).

Observational Studies - CINAHL. In: CADTH Search Filters Database. Ottawa: CADTH; 2024: <https://searchfilters.cadth.ca/link/88>. Accessed 2024-04-13.

### ***[Qualitative Studies Filters]***

Qualitative Studies - MEDLINE. In: CADTH Search Filters Database. Ottawa: CADTH; 2024: <https://searchfilters.cadth.ca/link/40>. Accessed 2024-08-01.

Qualitative Add-On Option - Surveys and Questionnaires - MEDLINE. In: CADTH Search Filters Database. Ottawa: CADTH; 2024: <https://searchfilters.cadth.ca/link/42>. Accessed 2024-08-01.

### ***[Systematic Reviews & Meta-analysis Filters]***

SLR Filter *MODIFIED – balanced version* Montori VM, Wilczynski NL, Morgan D, Haynes RB; Hedges Team. Optimal search strategies for retrieving systematic reviews from Medline: analytical survey. *BMJ*. 2005 Jan 8;330(7482):68. doi: 10.1136/bmj.38336.804167.47. Epub 2004 Dec 24. [PMID: 15619601](https://pubmed.ncbi.nlm.nih.gov/15619601/); [PMCID: PMC543864](https://pubmed.ncbi.nlm.nih.gov/15619601/).

## **MULTIFILE SEARCH**

Database(s): **Embase Classic+Embase** 1947 to 2024 April 26, **Ovid Healthstar** 1966 to March 2024, **Ovid MEDLINE(R) ALL** 1946 to April 26, 2024

Search Strategy:

| # | Searches                                                                                                                                                                                                                                                                                                                                                                                                                                                                                                                                                                                                                                                                                                                                                                                                                                                                                      | Results |
|---|-----------------------------------------------------------------------------------------------------------------------------------------------------------------------------------------------------------------------------------------------------------------------------------------------------------------------------------------------------------------------------------------------------------------------------------------------------------------------------------------------------------------------------------------------------------------------------------------------------------------------------------------------------------------------------------------------------------------------------------------------------------------------------------------------------------------------------------------------------------------------------------------------|---------|
| 1 | exp Stroke/th, dt, pc, rh or (stroke? or apoplex* or ((cardiovascul* or cardio-vascul* or (brain adj1 vascular)) adj3 (accident? or failure? or injur* or insufficien* or insult? or (acute adj1 (focal or lesion?)) or arrest?)) or ((brain or brainstem? or brain-stem? or subcortical* or (choroidal adj1 arter*) or cerebral or CVA? or ACA? or MCA? or PCA?) adj3 (infarct* or accident? or attack? or insult*)) or (insultus adj1 cerebrialis) or LACS or "lacunar syndrome" or "brain blood flow disturbance").ti,ab,kw,kf. /freq=2 [STROKE TERMS]                                                                                                                                                                                                                                                                                                                                     | 809633  |
| 2 | Dementia, Vascular/th, dt, pc, rh or CADASIL/th, pc or Dementia, Multi-Infarct/th, pc, rh or (exp Cognitive Dysfunction/th, dt, pc, rh and exp Cerebrovascular Disorders/th, dt, pc, rh) or ((dement* adj3 (vascular or arteriosclerotic or multiinfarct* or multi-infarct* or lacunar)) or (Binswanger* adj2 (disease? or encephalopath*)) or CADASIL or CADASILM or ("cerebral autosomal dominant arteriopathy" adj3 subcortical infarct? adj3 (leucoencephalopath* or leukoencephalopath*)) or (subcortical adj3 (leucoencephalopath* or leukoencephalopath* or encephalopath*)) or ((VCI or MCI or (mild* adj3 cogniti* adj3 (disorder? or defect? or deficit? or disabil* or disabl* or dysfunction* or impair* or declin*))) and (vascular or arteriosclerotic or multiinfarct* or multi-infarct* or lacunar or cerebrovascular or cerebro-vascular))).ti,ab,kw,kf. /freq=2 [VCI TERMS] | 35100   |
| 3 | 1 or 2 [Concept #1]                                                                                                                                                                                                                                                                                                                                                                                                                                                                                                                                                                                                                                                                                                                                                                                                                                                                           | 836467  |
| 4 | *Behavior Therapy/ or (exp *Life Style/ and (medicine or intervention* or treat* or therap* or psychotherapy* or remed*).ti,ab.) or (((lifestyle? or life-style?) adj3 (medicine or (induce* adj1 illness*))) or (LSM and (lifestyle? or life-style?)) or (((lifestyle? or life-style?) adj3 (factor? or health?)) or (health*                                                                                                                                                                                                                                                                                                                                                                                                                                                                                                                                                                | 144495  |

|   |                                                                                                                                                                                                                                                                                                                                                                                                                                                                                                                                                                                                                                                                                                                                                                                                                                                                                                                                                                                                                                                                                                                                                                                                                                                                                                                                                                                                                                                                                                                                                                                                                                                                                                        |         |
|---|--------------------------------------------------------------------------------------------------------------------------------------------------------------------------------------------------------------------------------------------------------------------------------------------------------------------------------------------------------------------------------------------------------------------------------------------------------------------------------------------------------------------------------------------------------------------------------------------------------------------------------------------------------------------------------------------------------------------------------------------------------------------------------------------------------------------------------------------------------------------------------------------------------------------------------------------------------------------------------------------------------------------------------------------------------------------------------------------------------------------------------------------------------------------------------------------------------------------------------------------------------------------------------------------------------------------------------------------------------------------------------------------------------------------------------------------------------------------------------------------------------------------------------------------------------------------------------------------------------------------------------------------------------------------------------------------------------|---------|
|   | adj3 (habit? or diet? or eating or nutrition* or aging or ageing)) or (prudent* adj3 diet?) or (life* adj3 (stage* or course? or experience? or event?)) or ((aging or ageing) adj3 (well or active*)) or ((behavio?r* or lifestyle? or life-style? or time?) adj3 (sedentary or inactiv*)) or ((inactiv* or lack-of) and physical*) adj10 (medicine or (induce* adj1 illness*) or intervention? or therap* or counseling)) or (behavio#r* adj2 (chang* or activat* or intervention*))).ti,ab,kw,kf. /freq=2 [LIFESTYLE MEDICINE TERMS]                                                                                                                                                                                                                                                                                                                                                                                                                                                                                                                                                                                                                                                                                                                                                                                                                                                                                                                                                                                                                                                                                                                                                                |         |
| 5 | *Early Intervention, Educational/ or *Health Education/ or *Health Promotion/ or *Patient Education as Topic/ or *Consumer Health Information/ or ((Health Fairs/ or Primary Prevention/ or Tertiary Prevention/ or Quaternary Prevention/ or Preventive Health Services/ or Early Medical Intervention/ or Secondary Prevention/) and (("non" or "not") adj1 (medication? or drug? or pharma*).ti,ab.) or ((preventi* adj3 (program* or service? or healthcare? or primary or primordial or secondary or tertiary or quaternary or measure? or therap*)) or (preventi* adj3 (program* or service?) adj3 relaps*) or (early adj3 (therap* or intervention? or prophylaxi* or prophylac*)) or ((screening or testing) adj3 (service? or program*)) or ((health or wellness or well-being or wellbeing or diet* or nutrition*) adj3 (educat* or literac* or promot* or campaign? or service? or program* or awareness)) or (patient* adj3 health adj3 (literac* or inform*))).ti,ab,kw,kf. /freq=2 [PREVENTIVE HEALTH SERVICES TERMS]                                                                                                                                                                                                                                                                                                                                                                                                                                                                                                                                                                                                                                                                    | 1294448 |
| 6 | Nutrition Therapy/ or exp Diet Therapy/ or ((exp Nutrition Policy/ or Nutritional Status/ or exp Nutrition Surveys/ or exp Nutritional Requirements/ or "Diet, Food, and Nutrition"/ or exp Diet/) and (health* or therap* or support* or polic* or status* or state? or survey* or requirement* or recommendation* or modif* or guideline? or educat* or literac* or promot* or campaign? or service? or program* or awareness).ti,ab.) or (((diet* or calori*) adj3 (restrict* or reduce*)) or (energy adj3 (restrict* or reduce* or low) adj3 diet*) or ((healthy or health-enhanc* or health-promot* or healthful or prudent or low-calori* or carbohydrate-load* or low-carbohydrate or low-carb or carbohydrate-restricted or carb-restricted or ketogenic or diabetic or low-fat or fat-free or fatfree or fat-restricted or fat-reduced or mediterranean or paleolithic or paleo or weight-reduc* or weight-loss or (weight adj3 (loss or reduc*) adj3 program*) or (obesity adj3 manage*) or low-sodium or sodium-free or sodium-restricted or sodium-reduced or low-salt or salt-free or salt-restricted or salt-reduced or vegetarian* or plant-based or macrobiotic or vegan* or DASH) adj2 diet*) or ("Dietary Approaches To Stop Hypertension Diet" or DASH or NHANES) and diet*) or ((diet* or daily) adj3 (recommended or reference) adj3 (allowance* or intake?)) or (((portion? or serving?) adj2 size) and diet*) or (healthy adj1 eating) or (food adj1 policy) or ((diet* or nutrition* or nutritive) adj3 (healthy or therap* or support* or polic* or status* or state? or survey* or requirement* or recommendation* or modif* or guideline?))).ti,ab,kw,kf. [NUTRITION TERMS] | 2445143 |
| 7 | exp Exercise Therapy/ or Recreation Therapy/ or ((exp Exercise/ or exp Leisure Activities/ or Exercise Movement Techniques/) and (therap* or treatment* or remed* or rehabilit* or physiotherapy* or physio-                                                                                                                                                                                                                                                                                                                                                                                                                                                                                                                                                                                                                                                                                                                                                                                                                                                                                                                                                                                                                                                                                                                                                                                                                                                                                                                                                                                                                                                                                           | 594776  |

|    |                                                                                                                                                                                                                                                                                                                                                                                                                                                                                                                                                                                                                                                                                                                                                                                                                                                                                                                                                                                                                                                                                                                                                                                                          |         |
|----|----------------------------------------------------------------------------------------------------------------------------------------------------------------------------------------------------------------------------------------------------------------------------------------------------------------------------------------------------------------------------------------------------------------------------------------------------------------------------------------------------------------------------------------------------------------------------------------------------------------------------------------------------------------------------------------------------------------------------------------------------------------------------------------------------------------------------------------------------------------------------------------------------------------------------------------------------------------------------------------------------------------------------------------------------------------------------------------------------------------------------------------------------------------------------------------------------------|---------|
|    | therapy*).ti,ab.) or (((exercis* or (physical* adj3 activ*) or workout? or work-out? or fitness or (recreation* adj3 therap*) or exergame* or exer-gam* or ((active-video or virtual realit*) adj3 (gaming? or game?)) or calisthenics or ((active* or ballistic or dynamic or isometric) adj3 stretch*) or ((physical or circuit or endurance or interval? or intermittent* or sprint? or continuous-type or moderate or medium or MICT or resistance or weight-lifting or weight-bearing or dynamic or isometric? or isokinetic? or plyometric? or power) adj3 train*) or (physical adj3 (conditioning or effort? or exertion)) or ((preoperative or pre-operative) adj3 (condition* or rehabilitat*)) or prehabilitat* or running or jogging or swimming or walking or kinesiotherap* or kinesitherapy* or pilates or Tai Chi or yoga or leisure* or recreation) adj10 (therap* or treatment* or remed* or rehabilit* or physiotherapy* or physio-therapy*)) or (healthy adj1 movement adj3 behavio#r*).ti,ab,kw,kf. [EXERCISE TERMS]                                                                                                                                                                 |         |
| 8  | exp Sleep/ or (sleep* or somnolence or hypersomnolence or hyper-somnolence or hypersleepiness or hyper-sleepiness or microsleep* or micro-sleep* or (rapid* adj3 eye? adj3 movement?) or N1sleep or N2sleep or ((NREM or NREMS or N-REM or non-rem) adj2 stage) or dream* or nightmare? or sopor).ti,ab,kw,kf. [SLEEP TERMS]                                                                                                                                                                                                                                                                                                                                                                                                                                                                                                                                                                                                                                                                                                                                                                                                                                                                             | 926503  |
| 9  | exp Stress, Psychological/ or (stress* or burnout? or burn-out? or exhaust* or trauma? or ((caregiver? or care-giver? or carer? or psychologic*) adj3 (burden* or strain\$2 or exhaust* or distress* or fatigue?)) or (care adj3 (burden* or self)) or ((mental* or nervous* or psychologic* or psychic) adj3 tension?)).ti,ab,kw,kf. [STRESS TERMS]                                                                                                                                                                                                                                                                                                                                                                                                                                                                                                                                                                                                                                                                                                                                                                                                                                                     | 4592963 |
| 10 | exp Self Care/ or Self-Management/ or (self-care or self-management or self-treatment or selfcare or selfmanagement or selftreatment or self-administration or self-medication or self-testing or self-help or relax* or rest*).ti,ab,kw,kf. [SELF CARE / HARM REDUCTION TERMS]                                                                                                                                                                                                                                                                                                                                                                                                                                                                                                                                                                                                                                                                                                                                                                                                                                                                                                                          | 4726988 |
| 11 | exp Mind-Body Therapies/ or ((mind-body adj2 (therap* or medicine or technique? or heal*)) or aromatherap* or aroma-therapy or ((psycholog* or psychophysiologic* or psycho-physiologic* or brainwave? or brain-wave? or alpha or electromyography or EEG or electroencephalograph*) adj2 (biofeedback? or bio-feedback? or biofeed-back?)) or myofeedback? or myobiofeedback? or neurofeedback? or myo-feedback? or myobio-feedback? or neuro-feedback? or (breathing adj2 exercis*) or (respiratory adj2 muscle? adj2 train*) or Qigong or hypnos#s or hypnot* or hypnogenesis or hypnotherap* or mesmerism or hypno-analyst#s or (autogenic adj2 training) or (progressive adj2 relaxation) or ((psychotherap* or guided) adj2 imagery) or ((humo?r or laugh* or clown*) adj2 (therap* or intervention or qigong or meditation)) or meditate* or gelototherapy or ecotherapies or geloto-therapy or eco-therapies or ((relax* or nature or "directed reverie" or touch*) adj3 (therap* or method? or technique* or technic*)) or Tai-ji or Tai-Chi or Taiji or Taijiquan or T-ai-Chi or Tai-Chi-Chuan or reiki or "laying-on-of-hands" or yoga or pranayama).ti,ab,kw,kf. [MIND-BODY THERAPIES TERMS] | 312702  |
| 12 | Interpersonal Relations/ or Intergenerational Relations/ or Sibling Relations/ or ((exp Social Integration/ or Social Interaction/ or Social Skills/ or Social                                                                                                                                                                                                                                                                                                                                                                                                                                                                                                                                                                                                                                                                                                                                                                                                                                                                                                                                                                                                                                           | 2380357 |

|    |                                                                                                                                                                                                                                                                                                                                                                                                                                                                                                                                                                                                                                                                                                                                                                                                                                                                                                                                                                                                                                                                                                                                                                                                                                                                                                                                                                                                                                                                                                                                                                                                                                                                                                                                                                                                                                                                                                                                                                                                                                                                                                                                                                                                                                                                                                                                                                                                                                                                                                                                                                                                                                                                                                                                                                                                                                                                |         |
|----|----------------------------------------------------------------------------------------------------------------------------------------------------------------------------------------------------------------------------------------------------------------------------------------------------------------------------------------------------------------------------------------------------------------------------------------------------------------------------------------------------------------------------------------------------------------------------------------------------------------------------------------------------------------------------------------------------------------------------------------------------------------------------------------------------------------------------------------------------------------------------------------------------------------------------------------------------------------------------------------------------------------------------------------------------------------------------------------------------------------------------------------------------------------------------------------------------------------------------------------------------------------------------------------------------------------------------------------------------------------------------------------------------------------------------------------------------------------------------------------------------------------------------------------------------------------------------------------------------------------------------------------------------------------------------------------------------------------------------------------------------------------------------------------------------------------------------------------------------------------------------------------------------------------------------------------------------------------------------------------------------------------------------------------------------------------------------------------------------------------------------------------------------------------------------------------------------------------------------------------------------------------------------------------------------------------------------------------------------------------------------------------------------------------------------------------------------------------------------------------------------------------------------------------------------------------------------------------------------------------------------------------------------------------------------------------------------------------------------------------------------------------------------------------------------------------------------------------------------------------|---------|
|    | <p>Conformity/ or exp Social Environment/ or Community Resources/ or Family/ or Adult Children/ or exp Family Characteristics/ or Family Relations/ or Family Conflict/ or Family Support/ or Family Separation/ or Grandparents/ or Military Family/ or Only Child/ or exp Parents/ or Siblings/ or Spouses/ or Friends/ or Peer Influence/ or Social Networking/ or Online Social Networking/ or exp Social Isolation/) and (connection* or support* or relationship* or relation? or dynamic* or encourag* or assist* or network* or intimac* or closeness or integrat* or interact* or reject* or exclusion or exclude* or alienat* or isolate* or stress*).ti,ab.) or (((interpersonal or interpersonal or social* or human? or interhuman or inter-human or intergeneration* or inter-generation* or communit* or famil* or child or kin or kinship or marri* or marital or couples or partner? or interparental or interparental or son? or daughter? or husband? or wife? or stepparent? or stepparent? or widower? or widow? or spouse? or parent? or father? or mother? or sibling? or sister? or brother? or grandparent? or grand-parent? or grandfather? or grand-father? or grandmother? or grand-mother? or friend? or companion? or acquaintance? or household? or patriarch* or matriarch* or stepfamil*) adj3 (relation* or dynamic* or support* or conflict? or encourag* or assist* or network* or intimac* or closeness or connect* or integrat* or interact* or reject* or exclusion or exclude* or alienat* or isolate* or stress*)) or ((social or interpersonal or inter-personal) adj1 (ability* or skill or competenc* or norm?)) or ((social or psychosocial or psycho-social or cultural*) adj1 (support* or depriv* or disadvantage* or dis-advantage* or context?)) or ((peer? or societal) adj1 (pressur* or influenc* or reject*)) or ((loneliness or lonely or homesick* or solitude or ostracism? or (living adj1 alone)) adj4 (dynamic* or conflict? or reject* or exclusion or exclude* or alienat* or isolate* or stress*)) or (neighborhood? adj2 (support* or assist* or network* or depriv* or disadvantage* or dis-advantage* or environment?)) or (((marital or separat*) adj2 status) or (maritally adj1 unattached) or (consensual adj1 union?) or divorc* or marriage? or intermarriage? or remarriage? or inter-marriage? or re-marriage? or bachelor? or ((single or unmarried or un-married or never-married or lone or unwed) adj2 (person? or parent? or stepparent? or step-parent? or mother? or father? or wom#n or men))) adj3 (relation* or dynamic* or support* or conflict? or encourag* or assist* or network* or intimac* or closeness or connect* or integrat* or interact* or reject* or exclusion or exclude* or alienat* or isolate* or stress*))).ti,ab,kw,kf. [SOCIAL CONNECTIONS TERMS]</p> |         |
| 13 | <p>exp Substance-Related Disorders/ or (addict* or alcoholism or alcoholic? or nicotinism or tobaccoism or narcotism or toxicomania? or dipsomania? or dipsomaniac? or (((illicit adj2 (drug? or substance?)) or narcotic? or heroin or morphine or opiate? or opium or cocaine or crack or chemical? or alcohol* or ethanol or hashish or cannabis or marijuana or blunt or polydrug? or inhalant? or glue? or amphetamin? or methamphetamin? or benzodiazepine or tobacco or nicotine) adj3 (dependen* or disorder? or use? or using or user? or usage or misuse? or abuse* or overdose? or depression or misuse? or habituat* or facilitation? or craving)) or ((inhalant? or glue?) adj3 sniffing) or (alcohol*</p>                                                                                                                                                                                                                                                                                                                                                                                                                                                                                                                                                                                                                                                                                                                                                                                                                                                                                                                                                                                                                                                                                                                                                                                                                                                                                                                                                                                                                                                                                                                                                                                                                                                                                                                                                                                                                                                                                                                                                                                                                                                                                                                                        | 1710276 |

|    |                                                                                                                                                                                                                                                                                                                                                                                                                                                                                                                                                                             |          |
|----|-----------------------------------------------------------------------------------------------------------------------------------------------------------------------------------------------------------------------------------------------------------------------------------------------------------------------------------------------------------------------------------------------------------------------------------------------------------------------------------------------------------------------------------------------------------------------------|----------|
|    | adj3 (problem? or cardiomyopath* or pancreatitis or neuropath* or polyneuropath* or polyneuritides or polyneuritis or (chronic* adj1 intoxicat*) or ((related or induc*) adj1 disorder?) or ((amnesic or dysmnesic) adj1 (psychos#s or syndrom?)) or (liver adj1 disease?)).ti,ab,kw,kf. [SUBSTANCE USE TERMS]                                                                                                                                                                                                                                                              |          |
| 14 | *Harm Reduction/ or *Risk Reduction Behavior/ or (Protective Factors/ and (risk* adj3 (reduc* or decreas* or lower* or mitigat* or minimis* or minimiz* or lessen*) adj3 (behavio?r* or lifestyle? or life-style?)).ti,ab.) or ((risk* adj3 (reduc* or decreas* or lower* or mitigat* or minimis* or minimiz* or lessen*) adj3 (behavio?r* or lifestyle? or life-style?)) or (protecti* adj2 factor?) or ((harm? or risk? or stress*) adj3 (minimiz* or reduc* or manag* or lessen* or decreas* or lower* or cutting)).ti,ab,kw,kf. /freq=2 [RISK REDUCTION BEHAVIOR TERMS] | 641228   |
| 15 | 13 and 14                                                                                                                                                                                                                                                                                                                                                                                                                                                                                                                                                                   | 39722    |
| 16 | or/4-12,15 [Concept #2: STREAM #1 - LSM & 5 pillars & Preventative Medicine Terms]                                                                                                                                                                                                                                                                                                                                                                                                                                                                                          | 14859437 |
| 17 | or/4-5,8-12 [Concept #2: STREAM #2 - LSM & 5 pillars & Preventative Medicine; excluding substance abuse, exercise & nutrition Terms]                                                                                                                                                                                                                                                                                                                                                                                                                                        | 12671600 |
| 18 | Behavior Therapy/ or (((("not" or "non" or without) adj1 (pharma* or drug? or medication?)) or nonpharma* or nondrug? or NPI? or (behavio#r* adj2 (chang* or activat*)) adj8 (intervention* or treat* or therap* or care or psychotherapy* or remed* or measure?)) or (behavio#r* adj3 intervention*)).ti,ab,kw,kf. [Concept #2: STREAM #3 - NON-PHARMACOLOGIC INTERVENTIONS]                                                                                                                                                                                               | 228164   |
| 19 | ((Risk Factors/ or Heart Disease Risk Factors/ or Cardiometabolic Risk Factors/) and (risk* adj3 factor? adj3 (modif* or chang* or adjust* or alter or altering or altered)).ti,ab.) or ((risk* adj3 (factor* or scor*) adj3 (modif* or chang* or adjust* or alter or altering or altered)) or (risk* adj3 (cardiovascular or cardio-vascular or ((cardiac or heart) adj2 disease?)) adj3 (modif* or chang* or adjust* or alter or altering or altered)).ti,ab,kw,kf. [MODIFIABLE RISK FACTORS TERMS]                                                                       | 140731   |
| 20 | exp Hypertension/th, dt, pc, rh or (hypertensi* or HTN or ((high or elevat* or raised or rising) adj3 blood adj3 pressure) or prehypertensi* or prehypertensi* or (systolic adj3 BP adj3 (high or elevat* or raised or rising)) or "Pph1 With Hht" or Goldblatt or (retinal adj3 macroaneurysm?) or "White Coat Syndrome" or "HELLP syndrome" or (((posterior adj3 (leukoencephalopathy or reversible encephalopathy)) or PRES or RPLS) adj3 syndrome)).ti,ab,kw,kf. [HYPERTENSION TERMS]                                                                                   | 1902485  |
| 21 | exp Hyperlipidemias/th, dt, pc, rh or (hyperlip?emi* or hyperlipid?emi* or lip?emi* or lipid?emi* or cholesteremia? or cholesterinemia? or cholesterolemia? or hypercholesteremia? or hypercholesterin?emia? or hypercholesterol?emi* or ((elevated or high) adj1 cholesterol) or hyperlipoproteinemi* or hypertriglyceridaemi* or mckusick-14575 or (triglyceride? adj2 storage adj2 disease) or triglyceridemi*).ti,ab,kw,kf. [HYPERLIPIDEMIA TERMS]                                                                                                                      | 354787   |

|    |                                                                                                                                                                                                                                                                                                                                                                                                                                                                                                                                                                                                                                                                                                                                                                                                                                                                                                                                                                                                                                                                                                                                                                                                                                                                                                                                                                                                                                                                     |        |
|----|---------------------------------------------------------------------------------------------------------------------------------------------------------------------------------------------------------------------------------------------------------------------------------------------------------------------------------------------------------------------------------------------------------------------------------------------------------------------------------------------------------------------------------------------------------------------------------------------------------------------------------------------------------------------------------------------------------------------------------------------------------------------------------------------------------------------------------------------------------------------------------------------------------------------------------------------------------------------------------------------------------------------------------------------------------------------------------------------------------------------------------------------------------------------------------------------------------------------------------------------------------------------------------------------------------------------------------------------------------------------------------------------------------------------------------------------------------------------|--------|
| 22 | exp Hyperglycemia/th, dt, pc, rh or (hyperglycemi* or hyperglucemi* or hyperglycaemi* or hyper-glycemi* or hyper-glucemi* or hyper-glycaemi* or (elevated adj3 (glucose or sugar) adj3 blood) or (glucose adj1 intoleran*) or ((impair* or diminish* or poor*) adj3 glucose adj3 toleran*)).ti,ab,kw,kf. [HYPERGLYCEMIA TERMS]                                                                                                                                                                                                                                                                                                                                                                                                                                                                                                                                                                                                                                                                                                                                                                                                                                                                                                                                                                                                                                                                                                                                      | 315790 |
| 23 | Alcohol Drinking/th, pc or (alcohol* adj3 (consum* or intake? or in-take? or (drinking adj1 habit?) or use*)).ti,ab,kw,kf. [ALCOHOL CONSUMPTION TERMS]                                                                                                                                                                                                                                                                                                                                                                                                                                                                                                                                                                                                                                                                                                                                                                                                                                                                                                                                                                                                                                                                                                                                                                                                                                                                                                              | 427463 |
| 24 | Smoking Cessation/mt, px or "Tobacco Use Cessation"/ or Smoking Prevention/ or (exp Smoking/th and (prevent* or cessation or abstinence or abstaining or stop* or quit* or withdrawal or dehabituat* or giving-up or discontinu* or dis-continu* or end* or halt*).ti,ab.) or (((smoking? or smoke or smok*2 or nicotine or tobacco or ((cigar? or cigarette? or non-tobacco or vaping or vape? or e-cig or ecig or e-cigarette? or ecigarette? or electronic cigarette?) adj2 (dependen* or use? or using or user? or usage or misuse? or craving))) adj4 (prevent* or cessation or abstinence or abstaining or stop* or quit* or withdrawal or dehabituat* or giving-up or discontinu* or dis-continu* or end* or halt*)) or (anti-smoking adj3 (educat* or campaign?)).ti,ab,kw,kf. [SMOKING TERMS]                                                                                                                                                                                                                                                                                                                                                                                                                                                                                                                                                                                                                                                              | 135935 |
| 25 | Diet, Atherogenic/ or Overnutrition/ or ((Diet/tu, th or Diet, Western/ or Diet, High-Fat/ or Feeding Behavior/px or Food Preferences/px or exp Appetite/ or Portion Size/ or Serving Size/) and ((diet* or nutrition* or eat* or feed*) adj2 (poor or poorly or bad*2 or unhealthy or un-healthy or disordered or obesogenic or (obesity adj1 induc*) or deficient* or improper* or inadequate or lacking or unsatisfactory or defective or faulty or inferior or harmful*2 or unbalanced or un-balanced)).ti,ab,kw,kf.) or ((diet or nutrition* or meal* or hyperphagia or overeat* or polyphagia? or ((eat* or feed* or food? or alimentary) adj1 (habit or pattern or behavior?r?)) or (food? adj1 (prefer* or select* or choice? or crav* or intake? or consum* or uptake? or quantit* or portion?)) or ((appetite? or appetite? or orexia? or portion size? or serving size?) adj1 (regulat* or control* or manage* or restrain* or curb* or limit* or suppres*))) adj4 (poor or poorly or bad or badly or unhealthy or un-healthy or disordered or obesogenic or (obesity adj1 induc*) or deficient* or improper* or inadequate* or lacking or unsatisfactory* or defective or faulty or inferior or harmful*2 or unbalanced or un-balanced or overnutrition or over-nutrition or hypernutrition or hyper-nutrition or ketogenic or ((high or rich) adj1 (fat? or lipid? or cholesterol)) or atherogenic* or atherogenetic*)).ti,ab,kw,kf. [POOR DIET TERMS] | 123308 |
| 26 | Sedentary Behavior/ or Hypokinesia/ or (sedentism or sedentar* or (((physical* adj2 (activ* or exertion or motion or movement)) or fitness or exercise*) adj3 (low or limited or minimal or reduced or insufficient* or "lack of")) or ((physical* or lifelong or lifestyle? or life-style? or person? or people or men or women or population? or patient?) adj2 inactiv*) or ("lack of" adj1 (activit* or movement? or fitness or exercise*)) or ((lifestyle? or life-style?) adj2 (idle or lazy or indolen* or letharg*)) or indolence or lethargy or hypodynamia? or hypokinesi* or hypanakinesi* or hypocinesi* or                                                                                                                                                                                                                                                                                                                                                                                                                                                                                                                                                                                                                                                                                                                                                                                                                                             | 342404 |

|    |                                                                                                                                                                                                                                                                                                                                                                                                                                                                                                                                                                                                                                                                                                                                                                                                                                                                                                                                                                                            |          |
|----|--------------------------------------------------------------------------------------------------------------------------------------------------------------------------------------------------------------------------------------------------------------------------------------------------------------------------------------------------------------------------------------------------------------------------------------------------------------------------------------------------------------------------------------------------------------------------------------------------------------------------------------------------------------------------------------------------------------------------------------------------------------------------------------------------------------------------------------------------------------------------------------------------------------------------------------------------------------------------------------------|----------|
|    | bradykinesia* or "sitting too long" or "being seated all day").ti,ab,kw,kf.<br>[LOW PHYSICAL ACTIVITY TERMS]                                                                                                                                                                                                                                                                                                                                                                                                                                                                                                                                                                                                                                                                                                                                                                                                                                                                               |          |
| 27 | or/19-22 [Concept #3: Outcomes STREAM #1 - only MRF, Hypertension, Hyperlipidemia, Hyperglycemia]                                                                                                                                                                                                                                                                                                                                                                                                                                                                                                                                                                                                                                                                                                                                                                                                                                                                                          | 2533814  |
| 28 | or/23-26 [Concept #3: Outcomes STREAM #2 - only alcohol use, smoking, bad diet, sedentary life]                                                                                                                                                                                                                                                                                                                                                                                                                                                                                                                                                                                                                                                                                                                                                                                                                                                                                            | 999975   |
| 29 | 3 and 16 and 27 [STREAM #1]                                                                                                                                                                                                                                                                                                                                                                                                                                                                                                                                                                                                                                                                                                                                                                                                                                                                                                                                                                | 28298    |
| 30 | 3 and 17 and 28 [STREAM #2]                                                                                                                                                                                                                                                                                                                                                                                                                                                                                                                                                                                                                                                                                                                                                                                                                                                                                                                                                                | 4981     |
| 31 | 3 and 18 and (27 or 28) [Concept #1 AND #2 AND #3 - STREAM #3]                                                                                                                                                                                                                                                                                                                                                                                                                                                                                                                                                                                                                                                                                                                                                                                                                                                                                                                             | 669      |
| 32 | 29 or 30 [Concept #1 AND #2 AND #3 - STREAM #1 & #2]                                                                                                                                                                                                                                                                                                                                                                                                                                                                                                                                                                                                                                                                                                                                                                                                                                                                                                                                       | 31248    |
| 33 | (exp Randomized Controlled Trial/ or "controlled clinical trial".pt. or (randomized or placebo or randomly).ab. or "clinical trials as topic".sh. or trial.ti.) not (exp Animals/ not humans.sh.) [RCTs Filter MEDLINE – Balanced, sensitive vs precise - Cochrane Handbook, 2023 revision]                                                                                                                                                                                                                                                                                                                                                                                                                                                                                                                                                                                                                                                                                                | 2894266  |
| 34 | exp Clinical Trials as Topic/ or exp Clinical trial/ or Placebos/ or Random allocation/ or Double blind method/ or Single blind method/ or (equivalence trial or pragmatic clinical trial).pt. or ((clinic\$ adj trial\$1) or randomised or randomi#ation? or RCT or placebo\$ or ((singl\$ or doubl\$ or trebl\$ or tripl\$) adj (mask\$ or blind\$ or dumm\$)) or ((study or trial or CT) adj3 (phase 2 or phase 2a or phase 2b or phase 2c or phase II or phase IIa or phase IIb or phase IIc or phase 3 or phase 3a or phase 3b or phase 3c or phase III or phase IIIa or phase IIIb or phase IIIc or "phase? 2/3" or "phase? II/III" or phase 4 or phase 4a or phase 4b or phase 4c or phase IV or phase IVa or phase IVb or phase IVc or "phase? 3/4" or "phase? III/IV")) or open label\$ or openlabel or ((single-arm or singlearm) adj2 (trial? or stud\$ or design?)).ti,ab,kw,kf.<br>[PHASE 2-4, OPEN LABEL - ADDITIONAL TERMS FOR BROADER CLINICAL TRIALS + SINGLE-ARM TRIALS] | 6540962  |
| 35 | 33 or 34 [RCTs ONLY]                                                                                                                                                                                                                                                                                                                                                                                                                                                                                                                                                                                                                                                                                                                                                                                                                                                                                                                                                                       | 7154341  |
| 36 | 32 and 35                                                                                                                                                                                                                                                                                                                                                                                                                                                                                                                                                                                                                                                                                                                                                                                                                                                                                                                                                                                  | 6315     |
| 37 | Cohort studies/ or comparative study/ or follow-up studies/ or prospective studies/ or risk factors/ or cohort.mp. or compared.mp. or groups.mp. or multivariate.mp. [NON-RANDOMIZED STUDIES – MEDLINE Filter - sensitive, Furlan,2006]                                                                                                                                                                                                                                                                                                                                                                                                                                                                                                                                                                                                                                                                                                                                                    | 27303442 |
| 38 | Comparative study/ or Follow-up studies/ or Time factors/ or (preoperat\$ or pre operat\$).mp. or (chang\$ or evaluat\$ or reviewed or prospective\$ or retrospective\$ or baseline or cohort or case series).tw. [OBSERVATIONAL STUDIES – MEDLINE Filter – max specificity, Fraser, 2006]                                                                                                                                                                                                                                                                                                                                                                                                                                                                                                                                                                                                                                                                                                 | 33992344 |
| 39 | non-randomized controlled trials as topic/ or controlled before-after studies/ or interrupted time series analysis/ or historically controlled study/ or case-control studies/ or cross-sectional studies/ or observational study/ or (((cohort or concurrent or non-concurrent or incidence or follow-up or followup or longitudinal or prospective or retrospective or nonrandom\$ or non-random\$ or quasi-random\$ or quasi-experiment\$ or quasirandom\$ or quasiexperiment\$ or pretest or posttest or pre-test or post-test or "before after" or CBA or                                                                                                                                                                                                                                                                                                                                                                                                                             | 9280611  |



|    |                                                                                                                                                                                                                                                                                                                                                                                                                                                                                                                                                                                                                                                                                                                                                                                                                                                                                                                                                                                                                                                                                                                                                                                                                                                                                                                                                                                                                           |          |
|----|---------------------------------------------------------------------------------------------------------------------------------------------------------------------------------------------------------------------------------------------------------------------------------------------------------------------------------------------------------------------------------------------------------------------------------------------------------------------------------------------------------------------------------------------------------------------------------------------------------------------------------------------------------------------------------------------------------------------------------------------------------------------------------------------------------------------------------------------------------------------------------------------------------------------------------------------------------------------------------------------------------------------------------------------------------------------------------------------------------------------------------------------------------------------------------------------------------------------------------------------------------------------------------------------------------------------------------------------------------------------------------------------------------------------------|----------|
|    | (historical\$ adj2 control\$) or case-control\$ or case-comparison or case-compeer or case-referrent or case-referent or case-base or casecontrol\$ or casecomparison or casecompeer or casereferrent or casereferent or casebase or cross-section\$ or crosssection\$ or prevalence) adj3 (stud\$ or design?) or non-RCT or nRCT or real-world or "real life evidence" or RWE or regist\$ or (ITS adj2 (stud\$ or design\$)) or (interrupted adj2 time adj2 series)).tw,kw,kf. [ADDITIONAL TERMS TO SUPPLEMENT NRS FILTERS]                                                                                                                                                                                                                                                                                                                                                                                                                                                                                                                                                                                                                                                                                                                                                                                                                                                                                              |          |
| 40 | or/37-39 [OBSERVATIONAL STUDIES]                                                                                                                                                                                                                                                                                                                                                                                                                                                                                                                                                                                                                                                                                                                                                                                                                                                                                                                                                                                                                                                                                                                                                                                                                                                                                                                                                                                          | 44575040 |
| 41 | 32 and 40                                                                                                                                                                                                                                                                                                                                                                                                                                                                                                                                                                                                                                                                                                                                                                                                                                                                                                                                                                                                                                                                                                                                                                                                                                                                                                                                                                                                                 | 26162    |
| 42 | (systematic review or systematic literature review or systematic scoping review or systematic narrative review or systematic qualitative review or systematic evidence review or systematic quantitative review or "systematic meta-review" or systematic critical review or systematic mixed studies review or systematic mapping review or systematic cochrane review or "systematic search and review" or systematic integrative review).ti. not comment.pt. not (protocol or protocols).ti. not MEDLINE.st.                                                                                                                                                                                                                                                                                                                                                                                                                                                                                                                                                                                                                                                                                                                                                                                                                                                                                                           | 342253   |
| 43 | (1469-493X or 1361-6137).is. and review.pt.                                                                                                                                                                                                                                                                                                                                                                                                                                                                                                                                                                                                                                                                                                                                                                                                                                                                                                                                                                                                                                                                                                                                                                                                                                                                                                                                                                               | 47767    |
| 44 | systematic review.pt.                                                                                                                                                                                                                                                                                                                                                                                                                                                                                                                                                                                                                                                                                                                                                                                                                                                                                                                                                                                                                                                                                                                                                                                                                                                                                                                                                                                                     | 517311   |
| 45 | or/42-44 [Ovid Expert Searches: SLR filter 2019]                                                                                                                                                                                                                                                                                                                                                                                                                                                                                                                                                                                                                                                                                                                                                                                                                                                                                                                                                                                                                                                                                                                                                                                                                                                                                                                                                                          | 869679   |
| 46 | (systematic overview\$ or evidence-based review\$ or evidence-based overview\$ or (evidence adj3 (review\$ or overview\$ or synthes\$)) or meta-review\$ or meta-overview\$ or meta-synthes\$ or metareview\$ or metaoverview\$ or metasynthes\$ or rapid review\$ or "review of reviews" or umbrella review?).tw,kw,kf. [Additional terms for synonyms for systematic reviews]                                                                                                                                                                                                                                                                                                                                                                                                                                                                                                                                                                                                                                                                                                                                                                                                                                                                                                                                                                                                                                           | 289371   |
| 47 | or/45-46 [Systematic Reviews Terms]                                                                                                                                                                                                                                                                                                                                                                                                                                                                                                                                                                                                                                                                                                                                                                                                                                                                                                                                                                                                                                                                                                                                                                                                                                                                                                                                                                                       | 1087785  |
| 48 | 32 and 47                                                                                                                                                                                                                                                                                                                                                                                                                                                                                                                                                                                                                                                                                                                                                                                                                                                                                                                                                                                                                                                                                                                                                                                                                                                                                                                                                                                                                 | 1170     |
| 49 | exp Empirical Research/ or Interviews as Topic/ or Personal Narratives as Topic/ or Focus Groups/ or exp Narration/ or Nursing Methodology Research/ or Narrative Medicine/ or (Interview or Personal Narrative).pt. or qualitative.ti,ab,kf,jw. or (interview* or theme* or thematic or "ethnological research" or ethnograph* or ethnomedicine or ethnonursing or phenomenol* or (grounded adj (theor* or study or studies or research or analys?s)) or "life stor*" or emic or etic or hermeneutic* or heuristic* or semiotic* or (data adj1 saturat\$) or participant observ* or "social construct*" or postmodern* or post-structural* or "post structural*" or poststructural* or "post modern*" or post-modern* or "action research" or "cooperative inquir*" or "co operative inquir*" or co-operative inquir* or humanistic or existential or experiential or paradigm* or (field adj (study or studies or research or work)) or "human science" or "social science" or "biographical method" or "theoretical sampl*" or (purpos* adj4 sampl*) or (focus adj group*) or open-ended or narrative* or textual or texts or semi-structured or "life world*" or life-world* or "conversation analys?s" or "personal experience*" or "theoretical saturation" or ((lived or life) adj experience*) or "cluster sampl*" or "observational method*" or "content analysis" or (constant adj (comparative or comparison)) | 4281071  |

|    |                                                                                                                                                                                                                                                                                                                                                                                                                                                                                                                                                                             |          |
|----|-----------------------------------------------------------------------------------------------------------------------------------------------------------------------------------------------------------------------------------------------------------------------------------------------------------------------------------------------------------------------------------------------------------------------------------------------------------------------------------------------------------------------------------------------------------------------------|----------|
|    | or ((discourse* or discours*) adj3 analys?s) or heidegger* or colaizzi* or spiegelberg* or merleau* or husserl* or foucault* or ricoeur or glaser* or (van adj manen*) or (van adj kaam*) or (corbin* adj2 strauss*).ti,ab,kf. [QUALITATIVE STUDIES]                                                                                                                                                                                                                                                                                                                        |          |
| 50 | "Surveys and Questionnaires"/ or Health Care Surveys/ or Self Report/ or (questionnaire* or survey*).ti,ab,kf. [CADTH Filter - Surveys and Questionnaires]                                                                                                                                                                                                                                                                                                                                                                                                                  | 5216670  |
| 51 | exp Nutrition Surveys/ or Patient Health Questionnaire/ [Add-On Qualitative Studies Terms]                                                                                                                                                                                                                                                                                                                                                                                                                                                                                  | 3062372  |
| 52 | or/49-51 [QUALITATIVE STUDIES & SURVEYS OR QUESTIONNAIRES]                                                                                                                                                                                                                                                                                                                                                                                                                                                                                                                  | 11193872 |
| 53 | 32 and 52                                                                                                                                                                                                                                                                                                                                                                                                                                                                                                                                                                   | 9520     |
| 54 | 31 or 36 or 41 or 48 or 53                                                                                                                                                                                                                                                                                                                                                                                                                                                                                                                                                  | 28372    |
| 55 | exp Animals/ not (exp Animals/ and Humans/) [ANIMAL STUDIES ONLY - REMOVE - MEDLINE]                                                                                                                                                                                                                                                                                                                                                                                                                                                                                        | 17820044 |
| 56 | (clinical trial protocol or address or autobiography or bibliography or biography or comment or dictionary or directory or editorial or "expression of concern" or festschrift or historical article or interactive tutorial or lecture or legal case or legislation or news or newspaper article or patient education handout or personal narrative or portrait or video-audio media or webcast or (letter not (letter and randomized controlled trial))).pt. [Opinion publications - Remove -MEDLINE]                                                                     | 6750161  |
| 57 | (Adolescent/ or exp Child/ or exp Infant/) not (exp Adult/ and (Adolescent/ or exp Child/ or exp Infant/)) [CHILDREN <19 REMOVE]                                                                                                                                                                                                                                                                                                                                                                                                                                            | 6578354  |
| 58 | 54 not (55 or 56 or 57) [ANIMAL STUDIES, OPINION PUBLICATIONS and CHILDREN <19 - REMOVED - MEDLINE]                                                                                                                                                                                                                                                                                                                                                                                                                                                                         | 22943    |
| 59 | limit 58 to yr="2000 -Current"                                                                                                                                                                                                                                                                                                                                                                                                                                                                                                                                              | 20349    |
| 60 | limit 59 to english language                                                                                                                                                                                                                                                                                                                                                                                                                                                                                                                                                | 19053    |
| 61 | 60 use medall [MEDLINE results]                                                                                                                                                                                                                                                                                                                                                                                                                                                                                                                                             | 3862     |
| 62 | 60 use hstr [Healthstar results]                                                                                                                                                                                                                                                                                                                                                                                                                                                                                                                                            | 7908     |
| 63 | exp cerebrovascular accident/th, pc, rh, dm or (stroke? or apoplex* or ((cardiovascul* or cardio-vascul* or (brain adj1 vascular)) adj3 (accident? or failure? or injur* or insufficien* or insult? or (acute adj1 (focal or lesion?)) or arrest?)) or ((brain or brainstem? or brain-stem? or subcortical* or (choroidal adj1 arter*) or cerebral or CVA? or ACA? or MCA? or PCA?) adj3 (infarct* or accident? or attack? or insult*)) or (insultus adj1 cerebrealis) or LACS or "lacunar syndrome" or "brain blood flow disturbance").ti,ab,kw,kf. /freq=2 [STROKE TERMS] | 796694   |
| 64 | multiinfarct dementia/th, pc, rh, dm or CADASIL/th, pc, rh, dm or (exp cognitive defect/th, pc, rh, dm and exp cerebrovascular disease/th, pc, rh, dm) or ((dement* adj3 (vascular or arteriosclerotic or multiinfarct* or multi-infarct* or lacunar)) or (Binswanger* adj2 (disease? or encephalopath*)) or CADASIL or CADASILM or ("cerebral autosomal dominant arteriopathy" adj3 subcortical infarct? adj3 (leucoencephalopath* or leucoencephalopath*))                                                                                                                | 31344    |

|    |                                                                                                                                                                                                                                                                                                                                                                                                                                                                                                                                                                                                                                                                                                                                                                                                                                                                                                                                                                                                                                                                                                               |         |
|----|---------------------------------------------------------------------------------------------------------------------------------------------------------------------------------------------------------------------------------------------------------------------------------------------------------------------------------------------------------------------------------------------------------------------------------------------------------------------------------------------------------------------------------------------------------------------------------------------------------------------------------------------------------------------------------------------------------------------------------------------------------------------------------------------------------------------------------------------------------------------------------------------------------------------------------------------------------------------------------------------------------------------------------------------------------------------------------------------------------------|---------|
|    | or (subcortical adj3 (leucoencephalopath* or leukoencephalopath* or encephalopath*)) or ((VCI or MCI or (mild* adj3 cogniti* adj3 (disorder? or defect? or deficit? or disabil* or disabl* or dysfunction* or impair* or declin*))) and (vascular or arteriosclerotic or multiinfarct* or multi-infarct* or lacunar or cerebrovascular or cerebro-vascular))).ti,ab,kw,kf. /freq=2 [VCI TERMS]                                                                                                                                                                                                                                                                                                                                                                                                                                                                                                                                                                                                                                                                                                                |         |
| 65 | 63 or 64 [Concept #1]                                                                                                                                                                                                                                                                                                                                                                                                                                                                                                                                                                                                                                                                                                                                                                                                                                                                                                                                                                                                                                                                                         | 821094  |
| 66 | *lifestyle modification/ or *behavior change/ or *healthy diet/ or *healthy aging/ or (exp *lifestyle/ and (medicine or intervention* or treat* or therap* or psychotherapy* or remed*).ti,ab.) or (((lifestyle? or life-style?) adj3 (medicine or (induce* adj1 illness*))) or (LSM and (lifestyle? or life-style?)) or (((lifestyle? or life-style?) adj3 (factor? or health?)) or (health* adj3 (habit? or diet? or eating or nutrition* or aging or ageing)) or (prudent* adj3 diet?) or (life* adj3 (stage* or course? or experience? or event?)) or ((aging or ageing) adj3 (well or active*)) or ((behavio#r* or lifestyle? or life-style? or time?) adj3 (sedentary or inactiv*)) or ((inactiv* or lack-of) and physical*)) adj10 (medicine or (induce* adj1 illness*) or intervention? or therap* or counseling)) or (behavio#r* adj2 (chang* or activat* or intervention*))).ti,ab,kw,kf. /freq=2 [LIFESTYLE MEDICINE TERMS]                                                                                                                                                                        | 108993  |
| 67 | *health education/ or exp *health literacy/ or exp *health promotion/ or *patient education/ or *consumer health information/ or ((primary prevention/ or prophylaxis/ or tertiary prevention/ or quaternary prevention/ or preventive health service/ or prevention/ or secondary prevention/) and (("non" or "not") adj1 (medication? or drug? or pharma*).ti,ab.) or ((preventi* adj3 (program* or service? or healthcare? or primary or primordial or secondary or tertiary or quaternary or measure? or therap*)) or (preventi* adj3 (program* or service?) adj3 relaps*) or (early adj3 (therap* or intervention? or prophylaxi* or prophylac*)) or ((screening or testing) adj3 (service? or program*)) or ((health or wellness or well-being or wellbeing or diet* or nutrition*) adj3 (educat* or literac* or promot* or campaign? or service? or program* or awareness)) or (patient* adj3 health adj3 (literac* or inform*))).ti,ab,kw,kf. /freq=2 [PREVENTIVE HEALTH SERVICES TERMS]                                                                                                              | 1306948 |
| 68 | exp diet therapy/ or ((nutrition policy/ or nutrition education/ or exp nutrition/) and (health* or therap* or support* or polic* or status* or state? or survey* or requirement* or recommendation* or modif* or guideline? or educat* or literac* or promot* or campaign? or service? or program* or awareness).ti,ab.) or (((diet* or calori*) adj3 (restrict* or reduce*)) or (energy adj3 (restrict* or reduce* or low) adj3 diet*) or ((healthy or health-enhanc* or health-promot* or healthful or prudent or low-calori* or carbohydrate-load* or low-carbohydrate or low-carb or carbohydrate-restricted or carb-restricted or ketogenic or diabetic or low-fat or fat-free or fatfree or fat-restricted or fat-reduced or mediterranean or paleolithic or paleo or weight-reduc* or weight-loss or (weight adj3 (loss or reduc*) adj3 program*) or (obesity adj3 manage*) or low-sodium or sodium-free or sodium-restricted or sodium-reduced or low-salt or salt-free or salt-restricted or salt-reduced or vegetarian* or plant-based or macrobiotic or vegan* or DASH) adj2 diet*) or (("Dietary | 2245172 |

|    |                                                                                                                                                                                                                                                                                                                                                                                                                                                                                                                                                                                                                                                                                                                                                                                                                                                                                                                                                                                                                                                                                                                                                                                                  |         |
|----|--------------------------------------------------------------------------------------------------------------------------------------------------------------------------------------------------------------------------------------------------------------------------------------------------------------------------------------------------------------------------------------------------------------------------------------------------------------------------------------------------------------------------------------------------------------------------------------------------------------------------------------------------------------------------------------------------------------------------------------------------------------------------------------------------------------------------------------------------------------------------------------------------------------------------------------------------------------------------------------------------------------------------------------------------------------------------------------------------------------------------------------------------------------------------------------------------|---------|
|    | Approaches To Stop Hypertension Diet" or DASH or NHANES) and diet*) or ((diet* or daily) adj3 (recommended or reference) adj3 (allowance* or intake*)) or (((portion? or serving?) adj2 size) and diet*) or (healthy adj1 eating) or (food adj1 policy) or ((diet* or nutrition* or nutritive) adj3 (healthy or therap* or support* or polic* or status* or state? or survey* or requirement* or recommendation* or modif* or guideline?))) .ti,ab,kw,kf. [NUTRITION TERMS]                                                                                                                                                                                                                                                                                                                                                                                                                                                                                                                                                                                                                                                                                                                      |         |
| 69 | exp kinesiotherapy/ or recreation therapy/ or ((exp exercise/ or leisure/) and (therap* or treatment* or remed* or rehabilit* or physiotherapy* or physiotherapy*).ti,ab.) or (((exercis* or (physical* adj3 activ*) or workout? or workout? or fitness or (recreation* adj3 therap*) or exergame* or exer-gam* or ((active-video or virtual realit*) adj3 (gaming? or game?)) or calisthenics or ((active* or ballistic or dynamic or isometric) adj3 stretch*) or ((physical or circuit or endurance or interval? or intermittent* or sprint? or continuous-type or moderate or medium or MICT or resistance or weight-lifting or weight-bearing or dynamic or isometric? or isokinetic? or plyometric? or power) adj3 train*) or (physical adj3 (conditioning or effort? or exertion)) or ((preoperative or pre-operative) adj3 (condition* or rehabilitat*)) or prehabilitat* or running or jogging or swimming or walking or kinesiotherap* or kinesitherapy* or pilates or Tai Chi or yoga or leisure* or recreation) adj10 (therap* or treatment* or remed* or rehabilit* or physiotherapy* or physio-therapy*)) or (healthy adj1 movement adj3 behavio#r*).ti,ab,kw,kf. [EXERCISE TERMS] | 485734  |
| 70 | exp sleep/ or sleep education/ or (sleep* or somnolence or hypersomnolence or hyper-somnolence or hypersleepiness or hyper-sleepiness or microsleep* or micro-sleep* or (rapid* adj3 eye? adj3 movement?) or N1sleep or N2sleep or ((NREM or NREMS N-REM or non-rem) adj2 stage) or dream* or nightmare? or sopor).ti,ab,kw,kf. [SLEEP TERMS]                                                                                                                                                                                                                                                                                                                                                                                                                                                                                                                                                                                                                                                                                                                                                                                                                                                    | 926508  |
| 71 | exp mental stress/ or caregiver burden/ or caregiver burnout/ or (stress* or burnout? or burn-out? or exhaust* or trauma? or ((caregiver? or care-giver? or carer? or psychologic*) adj3 (burden* or strain\$2 or exhaust* or distress* or fatigue?)) or (care adj3 (burden* or self)) or ((mental* or nervous* or psychologic* or psychic) adj3 tension?).ti,ab,kw,kf. [STRESS TERMS]                                                                                                                                                                                                                                                                                                                                                                                                                                                                                                                                                                                                                                                                                                                                                                                                           | 4500592 |
| 72 | exp self care/ or self care education/ or (self-care or self-management or self-treatment or selfcare or selfmanagement or selftreatment or self-administration or self-medication or self-testing or self-help or relax* or rest*).ti,ab,kw,kf. [SELF CARE / HARM REDUCTION TERMS]                                                                                                                                                                                                                                                                                                                                                                                                                                                                                                                                                                                                                                                                                                                                                                                                                                                                                                              | 4725739 |
| 73 | (alternative medicine/ and (stress* adj3 (minimiz* or reduc* or manag* or lessen* or decreas* or lower* or cutting)).tw.) or aromatherapy/ or exp breathing exercise/ or hypnosis/ or guided imagery/ or exp laughter therapy/ or meditation/ or relaxation training/ or therapeutic touch/ or exp yoga/ or ((mind-body adj2 (therap* or medicine or technique? or heal*)) or aromatherap* or aroma-therapy or ((psycholog* or psychophysiologic* or psycho-physiologic* or brainwave? or brain-wave? or alpha or electromyography or EEG or electroencephalograph*) adj2 (biofeedback? or bio-feedback? or biofeed-back?)) or myofeedback? or myobiofeedback? or                                                                                                                                                                                                                                                                                                                                                                                                                                                                                                                                | 236910  |

|           |                                                                                                                                                                                                                                                                                                                                                                                                                                                                                                                                                                                                                                                                                                                                                                                                                                                                                                                                                                                                                                                                                                                                                                                                                                                                                                                                                                                                                                                                                                                                                                                                                                                                                                                                                                                                                                                                                                                                                                                                                                                                                                                                                                                                                                                                                                                                                                                                                                                                                                                                                                                                                                                                                                                                                                                                |                |
|-----------|------------------------------------------------------------------------------------------------------------------------------------------------------------------------------------------------------------------------------------------------------------------------------------------------------------------------------------------------------------------------------------------------------------------------------------------------------------------------------------------------------------------------------------------------------------------------------------------------------------------------------------------------------------------------------------------------------------------------------------------------------------------------------------------------------------------------------------------------------------------------------------------------------------------------------------------------------------------------------------------------------------------------------------------------------------------------------------------------------------------------------------------------------------------------------------------------------------------------------------------------------------------------------------------------------------------------------------------------------------------------------------------------------------------------------------------------------------------------------------------------------------------------------------------------------------------------------------------------------------------------------------------------------------------------------------------------------------------------------------------------------------------------------------------------------------------------------------------------------------------------------------------------------------------------------------------------------------------------------------------------------------------------------------------------------------------------------------------------------------------------------------------------------------------------------------------------------------------------------------------------------------------------------------------------------------------------------------------------------------------------------------------------------------------------------------------------------------------------------------------------------------------------------------------------------------------------------------------------------------------------------------------------------------------------------------------------------------------------------------------------------------------------------------------------|----------------|
|           | <p>neurofeedback? or myo-feedback? or myobio-feedback? or neuro-feedback? or (breathing adj2 exercis*) or (respiratory adj2 muscle? adj2 train*) or Qigong or hypnos#s or hypnot* or hypnogenesis or hypnotherap* or mesmerism or hypno-analyst#s or (autogenic adj2 training) or (progressive adj2 relaxation) or ((psychotherap* or guided) adj2 imagery) or ((humo?r or laugh* or clown*) adj2 (therap* or intervention or qigong or meditation)) or meditate* or gelototherapy or ecotherapies or geloto-therapy or eco-therapies or ((relax* or nature or "directed reverie" or touch*) adj3 (therap* or method? or technique* or technic*)) or Tai-ji or Tai-Chi or Taiji or Taijiquan or T-ai-Chi or Tai-Chi-Chuan or reiki or "laying-on-of-hands" or yoga or pranayama).ti,ab,kw,kf. [MIND-BODY THERAPIES TERMS]</p>                                                                                                                                                                                                                                                                                                                                                                                                                                                                                                                                                                                                                                                                                                                                                                                                                                                                                                                                                                                                                                                                                                                                                                                                                                                                                                                                                                                                                                                                                                                                                                                                                                                                                                                                                                                                                                                                                                                                                                  |                |
| <p>74</p> | <p>human relation/ or family relation/ or family support/ or ((family life/ or family interaction/ or family functioning/ or family conflict/ or friendship/ or intimacy/ or peer pressure/ or social norm/ or exp social rejection/ or integration/ or collective efficacy/ or social cohesion/ or social interaction/ or social competence/ or family/ or adult child/ or only child/ or family structure/ or extended family/ or exp nuclear family/ or single-parent family/ or marriage/ or divorce/ or same-sex marriage/ or "single (marital status)"/ or exp widowed person/ or sibling relation/ or family separation/ or exp grandparent/ or military family/ or exp parent/ or social environment/ or community/ or community living/ or community resource/ or community support/ or home environment/ or exp neighborhood/ or psychosocial environment/ or social capital/ or exp social connectedness/ or exp social isolation/) and (connection* or support* or relationship* or relation? or dynamic* or encourag* or assist* or network* or intimac* or closeness or integrat* or interact* or reject* or exclusion or exclude* or alienat* or isolate* or stress*).ti,ab.) or (((interpersonal or inter-personal or social* or human? or interhuman or inter-human or intergeneration* or inter-generation* or communit* or famil* or child or kin or kinship or marri* or marital or couples or partner? or interparental or inter-parental or son? or daughter? or husband? or wife? or stepparent? or step-parent? or widower? or widow? or spouse? or parent? or father? or mother? or sibling? or sister? or brother? or grandparent? or grandparent? or grandfather? or grand-father? or grandmother? or grand-mother? or friend? or companion? or acquaintance? or household? or patriarch* or matriarch* or stepfamil*) adj3 (relation* or dynamic* or support* or conflict? or encourag* or assist* or network* or intimac* or closeness or connect* or integrat* or interact* or reject* or exclusion or exclude* or alienat* or isolate* or stress*)) or ((social or interpersonal or inter-personal) adj1 (ability* or skill or competenc* or norm?)) or ((social or psychosocial or psycho-social or cultural*) adj1 (support* or depriv* or disadvantage* or dis-advantage* or context?)) or ((peer? or societal) adj1 (pressur* or influenc* or reject*)) or ((loneliness or lonely or homesick* or solitude or ostracism? or (living adj1 alone)) adj4 (dynamic* or conflict? or reject* or exclusion or exclude* or alienat* or isolate* or stress*)) or (neighborhood? adj2 (support* or assist* or network* or depriv* or disadvantage* or dis-advantage* or environment?)) or (((marital or separat*) adj2 status) or (maritally adj1 unattached) or</p> | <p>2150626</p> |

|    |                                                                                                                                                                                                                                                                                                                                                                                                                                                                                                                                                                                                                                                                                                                                                                                                                                                                                                                                                                                                                          |          |
|----|--------------------------------------------------------------------------------------------------------------------------------------------------------------------------------------------------------------------------------------------------------------------------------------------------------------------------------------------------------------------------------------------------------------------------------------------------------------------------------------------------------------------------------------------------------------------------------------------------------------------------------------------------------------------------------------------------------------------------------------------------------------------------------------------------------------------------------------------------------------------------------------------------------------------------------------------------------------------------------------------------------------------------|----------|
|    | (consensual adj1 union?) or divorc* or marriage? or intermarriage? or remarriage? or inter-marriage? or re-marriage? or bachelor? or ((single or unmarried or un-married or never-married or lone or unwed) adj2 (person? or parent? or stepparent? or step-parent? or mother? or father? or wom#n or men))) adj3 (relation* or dynamic* or support* or conflict? or encourag* or assist* or network* or intimac* or closeness or connect* or integrat* or interact* or reject* or exclusion or exclude* or alienat* or isolate* or stress*))).ti,ab,kw,kf. [SOCIAL CONNECTIONS TERMS]                                                                                                                                                                                                                                                                                                                                                                                                                                   |          |
| 75 | exp drug dependence/ or (addict* or alcoholism or alcoholic? or nicotineism or tobaccoism or narcotism or toxicomania? or dipsomania? or dipsomaniac? or (((illicit adj2 (drug? or substance?)) or narcotic? or heroin or morphine or opiate? or opium or cocaine or crack or chemical? or alcohol* or ethanol or hashish or cannabis or marijuana or blunt or polydrug? or inhalant? or glue? or amphetamin? or methamphetamin? or benzodiazepine or tobacco or nicotine) adj3 (dependen* or disorder? or use? or using or user? or usage or misuse? or abuse* or overdose? or depression or misuse? or habituat* or facilitation? or craving)) or ((inhalant? or glue?) adj3 sniffing) or (alcohol* adj3 (problem? or cardiomyopath* or pancreatitis or neuropath* or polyneuropath* or polyneuritides or polyneuritis or (chronic* adj1 intoxicat*) or ((related or induc*) adj1 disorder?) or ((amnestic or dysmnesic) adj1 (psychos#s or syndrom?)) or (liver adj1 disease?))))).ti,ab,kw,kf. [SUBSTANCE USE TERMS] | 1710276  |
| 76 | *risk reduction/ or *harm reduction/ or (protection/ and (risk* adj3 (reduc* or decreas* or lower* or mitigat* or minimis* or minimiz* or lessen*) adj3 (behavio?r* or lifestyle? or life-style?)).ti,ab.) or ((risk* adj3 (reduc* or decreas* or lower* or mitigat* or minimis* or minimiz* or lessen*) adj3 (behavio?r* or lifestyle? or life-style?)) or (protecti* adj2 factor?) or ((harm? or risk? or stress*) adj3 (minimiz* or reduc* or manag* or lessen* or decreas* or lower* or cutting))).ti,ab,kw,kf. /freq=2 [RISK REDUCTION BEHAVIOR TERMS]                                                                                                                                                                                                                                                                                                                                                                                                                                                              | 641622   |
| 77 | 75 and 76                                                                                                                                                                                                                                                                                                                                                                                                                                                                                                                                                                                                                                                                                                                                                                                                                                                                                                                                                                                                                | 39731    |
| 78 | or/66-74,77 [Concept #2: STREAM #1 - LSM & 5 pillars & Preventative Medicine Terms]                                                                                                                                                                                                                                                                                                                                                                                                                                                                                                                                                                                                                                                                                                                                                                                                                                                                                                                                      | 14317117 |
| 79 | or/66-67,70-74 [Concept #2: STREAM #2 - LSM & 5 pillars & Preventative Medicine; excluding substance abuse, exercise & nutrition Terms]                                                                                                                                                                                                                                                                                                                                                                                                                                                                                                                                                                                                                                                                                                                                                                                                                                                                                  | 12346959 |
| 80 | behavior change/ or (((("not" or "non" or without) adj1 (pharma* or drug? or medication?)) or nonpharma* or nondrug? or NPI? or (behavio#r* adj2 (chang* or activat*))) adj8 (intervention* or treat* or therap* or care or psychotherapy* or remed*) or (behavio#r* adj3 intervention*))).ti,ab,kw,kf. [Concept #2: STREAM #3 - NON-PHARMACOLOGIC INTERVENTIONS]                                                                                                                                                                                                                                                                                                                                                                                                                                                                                                                                                                                                                                                        | 173297   |
| 81 | (exp risk factor/ and (risk* adj3 factor? adj3 (modif* or chang* or adjust* or alter or altering or altered)).ti,ab.) or ((risk* adj3 (factor* or scor*) adj3 (modif* or chang* or adjust* or alter or altering or altered)) or (risk* adj3 (cardiovascular or cardio-vascular or ((cardiac or heart) adj2 disease?)) adj3                                                                                                                                                                                                                                                                                                                                                                                                                                                                                                                                                                                                                                                                                               | 140731   |

|    |                                                                                                                                                                                                                                                                                                                                                                                                                                                                                                                                                                                                                                                                                                                                                                                          |         |
|----|------------------------------------------------------------------------------------------------------------------------------------------------------------------------------------------------------------------------------------------------------------------------------------------------------------------------------------------------------------------------------------------------------------------------------------------------------------------------------------------------------------------------------------------------------------------------------------------------------------------------------------------------------------------------------------------------------------------------------------------------------------------------------------------|---------|
|    | (modif* or chang* or adjust* or alter or altering or altered)).ti,ab,kw,kf. [MODIFIABLE RISK FACTORS TERMS]                                                                                                                                                                                                                                                                                                                                                                                                                                                                                                                                                                                                                                                                              |         |
| 82 | exp hypertension/th, pc, rh, dm or (hypertensi* or HTN or ((high or elevat* or raised or rising) adj3 blood adj3 pressure) or prehypertensi* or prehypertensi* or (systolic adj3 BP adj3 (high or elevat* or raised or rising)) or "Pph1 With Hht" or Goldblatt or (retinal adj3 macroaneurysm?) or "White Coat Syndrome" or "HELLP syndrome" or (((posterior adj3 (leukoencephalopathy or reversible encephalopathy)) or PRES or RPLS) adj3 syndrome)).ti,ab,kw,kf. [HYPERTENSION TERMS]                                                                                                                                                                                                                                                                                                | 1825199 |
| 83 | exp hyperlipidemia/th, pc, rh, dm or (hyperlip?emi* or hyperlipid?emi* or lip?emi* or lipid?emi* or cholesteremia? or cholesterinemia? or cholesterolemia? or hypercholesteremia? or hypercholesterin?emia? or hypercholesterol?emi* or ((elevated or high) adj1 cholesterol) or hyperlipoproteinemi* or hypertriglyceridaemi* or mckusick-14575 or (triglyceride? adj2 storage adj2 disease) or triglyceridemi*).ti,ab,kw,kf. [HYPERLIPIDEMIA TERMS]                                                                                                                                                                                                                                                                                                                                    | 324324  |
| 84 | hyperglycemia/th, pc, rh, dm or (hyperglycemi* or hyperglucemi* or hyperglycaemi* or hyper-glycemi* or hyper-glucemi* or hyper-glycaemi* or (elevated adj3 (glucose or sugar) adj3 blood) or (glucose adj1 intoleran*) or ((impair* or diminish* or poor*) adj3 glucose adj3 toleran*)).ti,ab,kw,kf. [HYPERGLYCEMIA TERMS]                                                                                                                                                                                                                                                                                                                                                                                                                                                               | 309697  |
| 85 | alcohol consumption/ or (alcohol* adj3 (consum* or intake? or in-take? or (drinking adj1 habit?) or use*)).ti,ab,kw,kf. [ALCOHOL CONSUMPTION TERMS]                                                                                                                                                                                                                                                                                                                                                                                                                                                                                                                                                                                                                                      | 549102  |
| 86 | (exp "smoking and smoking related phenomena"/th, pc and (prevent* or cessation or abstinence or abstaining or stop* or quit* or withdrawal or dehabituat* or giving-up or discontinu* or dis-contin* or end* or halt*).ti,ab.) or (((smoking? or smoke or smok*2 or nicotine or tobacco or ((cigar? or cigarette? or non-tobacco or vaping or vape? or e-cig or ecig or e-cigarette? or ecigarette? or electronic cigarette?) adj2 (dependen* or use? or using or user? or usage or misuse? or craving))) adj4 (prevent* or cessation or abstinence or abstaining or stop* or quit* or withdrawal or dehabituat* or giving-up or discontinu* or dis-contin* or end* or halt*)) or (anti-smoking adj3 (educat* or campaign?)).ti,ab,kw,kf. [SMOKING TERMS]                                | 186756  |
| 87 | unhealthy diet/ or obesogenic diet/ or ((Western diet/ or exp lipid diet/ or feeding behavior/ or food preference/ or appetite/ or increased appetite/ or meal size/ or portion size/) and ((diet* or nutrition* or eat* or feed*) adj2 (poor or poorly or bad*2 or unhealthy or un-healthy or disordered or obesogenic or (obesity adj1 induc*) or deficient* or improper* or inadequate or lacking or unsatisfactory or defective or faulty or inferior or harmful*2 or unbalanced or un-balanced)).ti,ab,kw,kf.) or ((diet or nutrition* or meal* or hyperphagia or overeat* or polyphagia? or ((eat* or feed* or food? or alimentary) adj1 (habit or pattern or behavior?r?)) or (food? adj1 (prefer* or select* or choice? or crav* or intake? or consum* or uptake? or quantit* or | 129231  |

|    |                                                                                                                                                                                                                                                                                                                                                                                                                                                                                                                                                                                                                                                                                                                                                                                     |          |
|----|-------------------------------------------------------------------------------------------------------------------------------------------------------------------------------------------------------------------------------------------------------------------------------------------------------------------------------------------------------------------------------------------------------------------------------------------------------------------------------------------------------------------------------------------------------------------------------------------------------------------------------------------------------------------------------------------------------------------------------------------------------------------------------------|----------|
|    | portion?)) or ((appetite? or appetite? or orexia? or portion size? or serving size?) adj1 (regulat* or control* or manage* or restrain* or curb* or limit* or suppres*))) adj4 (poor or poorly or bad or badly or unhealthy or un-healthy or disordered or obesogenic or (obesity adj1 induc*) or deficient* or improper* or inadequate* or lacking or unsatisfactory* or defective or faulty or inferior or harmful*2 or unbalanced or un-balanced or overnutrition or over-nutrition or hypernutrition or hyper-nutrition or ketogenic or ((high or rich) adj1 (fat? or lipid? or cholesterol)) or atherogenic* or atherogenetic*).ti,ab,kw,kf. /freq=2 [POOR DIET TERMS]                                                                                                         |          |
| 88 | sedentary lifestyle/ or hypokinesia/ or (sedentism or sedentar* or (((physical* adj2 (activ* or exertion or motion or movement)) or fitness or exercise*) adj3 (low or limited or minimal or reduced or insufficient* or "lack of")) or ((physical* or lifelong or lifestyle? or life-style? or person? or people or men or women or population? or patient?) adj2 inactiv*) or ("lack of" adj1 (activit* or movement? or fitness or exercise*)) or ((lifestyle? or life-style?) adj2 (idle or lazy or indolen* or letharg*)) or indolence or lethargy or hypodynamia? or hypokinesi* or hypanakinesi* or hypocinesi* or bradykinesia* or "sitting too long" or "being seated all day").ti,ab,kw,kf. [LOW PHYSICAL ACTIVITY TERMS]                                                  | 345096   |
| 89 | or/81-84 [Concept #3: Outcomes STREAM #1 - only MRF, Hypertension, Hyperlipidemia, Hyperglycemia]                                                                                                                                                                                                                                                                                                                                                                                                                                                                                                                                                                                                                                                                                   | 2430007  |
| 90 | or/85-88 [Concept #3: Outcomes STREAM #2 - only alcohol use, smoking, bad diet, sedentary life]                                                                                                                                                                                                                                                                                                                                                                                                                                                                                                                                                                                                                                                                                     | 1172739  |
| 91 | 65 and 78 and 89 [STREAM #1]                                                                                                                                                                                                                                                                                                                                                                                                                                                                                                                                                                                                                                                                                                                                                        | 26861    |
| 92 | 65 and 79 and 90 [STREAM #2]                                                                                                                                                                                                                                                                                                                                                                                                                                                                                                                                                                                                                                                                                                                                                        | 5620     |
| 93 | 65 and 80 and (89 or 90) [Concept #1 AND #2 AND #3 - STREAM #3]                                                                                                                                                                                                                                                                                                                                                                                                                                                                                                                                                                                                                                                                                                                     | 726      |
| 94 | 91 or 92 [Concept #1 AND #2 AND #3]                                                                                                                                                                                                                                                                                                                                                                                                                                                                                                                                                                                                                                                                                                                                                 | 30199    |
| 95 | exp randomized controlled trial/ or controlled clinical study/ or randomization/ or intermethod comparison/ or double blind procedure/ or human experiment/ or trial.ti. or ((evaluated or evaluate or evaluating or assessed or assess) and (compare or compared or comparing or comparison)).ab. or (random\$ or placebo or compare or compared or comparison or (open adj label) or ((double or single or doubly or singly) adj (blind or blinded or blindly)) or parallel group\$1 or (crossover or cross over) or ((assign\$ or match or matched or allocation) adj5 (alternate or group\$1 or intervention\$1 or patient\$1 or subject\$1 or participant\$1)) or (assigned or allocated) or (controlled adj7 (study or design or trial)) or (volunteer or volunteers)).ti,ab. | 21905202 |
| 96 | ((random\$ adj sampl\$ adj7 ("cross section\$" or questionnaire\$1 or survey\$ or database\$1)).ti,ab. not (comparative study/ or controlled study/ or randomi?ed controlled.ti,ab. or randomly assigned.ti,ab.)) or (cross-sectional study/ not (exp randomized controlled trial/ or controlled clinical study/ or controlled study/ or randomi?ed controlled.ti,ab. or control group\$1.ti,ab.)) or (((case adj control\$) and random\$) not randomi?ed controlled) or (nonrandom\$ not random\$) or "Random field\$" or (random cluster adj3 sampl\$)).ti,ab. or (systematic review not (trial or study)).ti. or ((review.ab. and review.pt.) not                                                                                                                                | 8182275  |



|     |                                                                                                                                                                                                                                                                                                                                                                                                                                                                                                                                                                                                                                                                                                                                                                                                                                                                                                                                                                                                                                                                                                                                                                                                                                                  |          |
|-----|--------------------------------------------------------------------------------------------------------------------------------------------------------------------------------------------------------------------------------------------------------------------------------------------------------------------------------------------------------------------------------------------------------------------------------------------------------------------------------------------------------------------------------------------------------------------------------------------------------------------------------------------------------------------------------------------------------------------------------------------------------------------------------------------------------------------------------------------------------------------------------------------------------------------------------------------------------------------------------------------------------------------------------------------------------------------------------------------------------------------------------------------------------------------------------------------------------------------------------------------------|----------|
|     | trial.ti.) or ("we searched".ab. and (review.ti. or review.pt.)) or ("update review" or (databases adj4 searched)).ab. or ((rat or rats or mouse or mice or swine or porcine or murine or sheep or lambs or pigs or piglets or rabbit or rabbits or cat or cats or dog or dogs or cattle or bovine or monkey or monkeys or trout or marmoset\$1).ti. and animal experiment/) or (Animal experiment/ not (human experiment/ or human/))                                                                                                                                                                                                                                                                                                                                                                                                                                                                                                                                                                                                                                                                                                                                                                                                           |          |
| 97  | 95 not 96 [RCTs – Embase sensitive Filter – Cochrane HSSS, 2023 revision]                                                                                                                                                                                                                                                                                                                                                                                                                                                                                                                                                                                                                                                                                                                                                                                                                                                                                                                                                                                                                                                                                                                                                                        | 19651756 |
| 98  | phase 2 clinical trial/ or phase 3 clinical trial/ or phase 4 clinical trial/ or (equivalence trial or pragmatic clinical trial).pt. or (randomised or randomi#ation? or RCT or placebo* or ((singl\$ or doubl\$ or trebl\$ or tripl\$) adj (mask\$ or blind\$ or dumm\$)) or ((study or trial or CT) adj3 (phase 2 or phase 2a or phase 2b or phase 2c or phase II or phase IIa or phase IIb or phase IIc or phase 3 or phase 3a or phase 3b or phase 3c or phase III or phase IIIa or phase IIIb or phase IIIc or "phase? 2/3" or "phase? II/III" or phase 4 or phase 4a or phase 4b or phase 4c or phase IV or phase IVa or phase IVb or phase IVc or "phase? 3/4" or "phase? III/IV")) or open label\$.tw,kw,kf. [PHASE 2-4, OPEN LABEL - ADDITIONAL TERMS TO SUPPLEMENT RCTs FILTER]                                                                                                                                                                                                                                                                                                                                                                                                                                                        | 2083900  |
| 99  | 97 or 98 [RCTs ONLY]                                                                                                                                                                                                                                                                                                                                                                                                                                                                                                                                                                                                                                                                                                                                                                                                                                                                                                                                                                                                                                                                                                                                                                                                                             | 19974359 |
| 100 | 94 and 99                                                                                                                                                                                                                                                                                                                                                                                                                                                                                                                                                                                                                                                                                                                                                                                                                                                                                                                                                                                                                                                                                                                                                                                                                                        | 11000    |
| 101 | Clinical article/ or controlled study/ or major clinical study/ or prospective study/ or cohort.mp. or compared.mp. or groups.mp. or multivariate.mp. [NON-RANDOMIZED STUDIES– Embase Filter - sensitive, Furlan,2006]                                                                                                                                                                                                                                                                                                                                                                                                                                                                                                                                                                                                                                                                                                                                                                                                                                                                                                                                                                                                                           | 30888236 |
| 102 | Controlled study/ or Treatment outcome/ or Major clinical study/ or Clinical trial/ or (chang\$ or evaluat\$ or reviewed or baseline or (compare\$ or compara\$)).tw. [OBSERVATIONAL STUDIES – Embase Filter – max specificity, Fraser, 2006]                                                                                                                                                                                                                                                                                                                                                                                                                                                                                                                                                                                                                                                                                                                                                                                                                                                                                                                                                                                                    | 41981585 |
| 103 | exp cohort analysis/ or exp case control study/ or controlled clinical trial/ or pretest posttest control group design/ or static group comparison/ or retrospective study/ or longitudinal study/ or intervention study/ or family study/ or case study/ or time series analysis/ or cross-sectional study/ or comparative study/ or observational study/ or quasi experimental study/ or (((cohort or concurrent or non-concurrent or incidence or follow-up or followup or longitudinal or prospective or retrospective or nonrandom\$ or non-random\$ or quasi-random\$ or quasi-experiment\$ or quasirandom\$ or quasiexperiment\$ or pretest or posttest or pre-test or post-test or "before after" or CBA or (historical\$ adj2 control\$) or case-control\$ or case-comparison or case-compeer or case-referrent or case-referent or case-base or casecontrol\$ or casecomparison or casecompeer or casereferrent or casereferent or casebase or cross-section\$ or crossection\$ or prevalence) adj3 (stud\$ or design?)) or non-RCT or nRCT or real-world or "real life evidence" or RWE or regist\$ or (ITS adj2 (stud\$ or design\$)) or (interrupted adj2 time adj2 series)).tw,kw,kf. [ADDITIONAL TERMS TO SUPPLEMENT NRS FILTERS] | 20419528 |
| 104 | or/101-103 [NRS & OBSERVATIONAL STUDIES]                                                                                                                                                                                                                                                                                                                                                                                                                                                                                                                                                                                                                                                                                                                                                                                                                                                                                                                                                                                                                                                                                                                                                                                                         | 52136430 |
| 105 | 94 and 104                                                                                                                                                                                                                                                                                                                                                                                                                                                                                                                                                                                                                                                                                                                                                                                                                                                                                                                                                                                                                                                                                                                                                                                                                                       | 25286    |

|     |                                                                                                                                                                                                                                                                                                                                                                                                                                                                                                                                                                                                                                                                                                                                                                                                                                                                                                                                                                                                                                                                                                                                                                                                                                                                                                                                                                                                                                                                                                                                                                                                                        |         |
|-----|------------------------------------------------------------------------------------------------------------------------------------------------------------------------------------------------------------------------------------------------------------------------------------------------------------------------------------------------------------------------------------------------------------------------------------------------------------------------------------------------------------------------------------------------------------------------------------------------------------------------------------------------------------------------------------------------------------------------------------------------------------------------------------------------------------------------------------------------------------------------------------------------------------------------------------------------------------------------------------------------------------------------------------------------------------------------------------------------------------------------------------------------------------------------------------------------------------------------------------------------------------------------------------------------------------------------------------------------------------------------------------------------------------------------------------------------------------------------------------------------------------------------------------------------------------------------------------------------------------------------|---------|
| 106 | exp meta analysis/ or ((meta adj analy\$) or metaanalys\$).mp. or (systematic adj (review? or overview?)).tw. or (cancerlit or cochrane or embase or psychlit or psyclit or psychinfo or psycinfo or cinahl or cinhal or science citation index or bids or reference lists or bibliograph\$ or hand-search\$ or manual search\$ or relevant journals).ab.                                                                                                                                                                                                                                                                                                                                                                                                                                                                                                                                                                                                                                                                                                                                                                                                                                                                                                                                                                                                                                                                                                                                                                                                                                                              | 1845000 |
| 107 | (data extraction or selection criteria).ab. and review.pt.                                                                                                                                                                                                                                                                                                                                                                                                                                                                                                                                                                                                                                                                                                                                                                                                                                                                                                                                                                                                                                                                                                                                                                                                                                                                                                                                                                                                                                                                                                                                                             | 115740  |
| 108 | 106 or 107 [SLR & MA FILTER - Ovid Expert Searches: SLR filter 2019]                                                                                                                                                                                                                                                                                                                                                                                                                                                                                                                                                                                                                                                                                                                                                                                                                                                                                                                                                                                                                                                                                                                                                                                                                                                                                                                                                                                                                                                                                                                                                   | 1862969 |
| 109 | (systematic overview\$ or evidence-based review\$ or evidence-based overview\$ or (evidence adj3 (review\$ or overview\$ or synthes\$)) or meta-review\$ or meta-overview\$ or meta-synthes\$ or metareview\$ or metaoverview\$ or metasynthes\$ or rapid review\$ or "review of reviews" or umbrella review?).tw,kw,kf. [Additional terms for synonyms for systematic reviews]                                                                                                                                                                                                                                                                                                                                                                                                                                                                                                                                                                                                                                                                                                                                                                                                                                                                                                                                                                                                                                                                                                                                                                                                                                        | 289371  |
| 110 | or/108-109 [Systematic Reviews Terms]                                                                                                                                                                                                                                                                                                                                                                                                                                                                                                                                                                                                                                                                                                                                                                                                                                                                                                                                                                                                                                                                                                                                                                                                                                                                                                                                                                                                                                                                                                                                                                                  | 2022511 |
| 111 | 94 and 110                                                                                                                                                                                                                                                                                                                                                                                                                                                                                                                                                                                                                                                                                                                                                                                                                                                                                                                                                                                                                                                                                                                                                                                                                                                                                                                                                                                                                                                                                                                                                                                                             | 2098    |
| 112 | empirical research/ or grounded theory/ or exp qualitative research/ or exp interview/ or narrative/ or nursing methodology research/ or narrative medicine/ or qualitative.ti,ab,kf,jx. or (interview* or theme* or thematic or "ethnological research" or ethnograph* or ethnomedicine or ethn nursing or phenomenol* or (grounded adj (theor* or study or studies or research or analys?s)) or "life stor*" or emic or etic or hermeneutic* or heuristic* or semiotic* or (data adj1 saturat\$) or participant observ* or "social construct*" or postmodern* or post-structural* or "post structural*" or poststructural* or "post modern*" or post-modern* or "action research" or "cooperative inquir*" or "co operative inquir*" or co-operative inquir* or humanistic or existential or experiential or paradigm* or (field adj (study or studies or research or work)) or "human science" or "social science" or "biographical method" or "theoretical sampl*" or (purpos* adj4 sampl*) or (focus adj group*) or open-ended or narrative* or textual or texts or semi-structured or "life world*" or life-world* or "conversation analys?s" or "personal experience*" or "theoretical saturation" or ((lived or life) adj experience*) or "cluster sampl*" or "observational method*" or "content analysis" or (constant adj (comparative or comparison)) or ((discourse* or discours*) adj3 analys?s) or heidegger* or colaizzi* or spiegelberg* or merleau* or husserl* or foucault* or ricoeur or glaser* or (van adj manen*) or (van adj kaam*) or (corbin* adj2 strauss*).ti,ab,kf. [QUALITATIVE STUDIES] | 3710237 |
| 113 | questionnaire/ or structured questionnaire/ or open ended questionnaire/ or health care survey/ or self report/ or (questionnaire* or survey*).ti,ab,kf. [CADTH Filter - Surveys and Questionnaires]                                                                                                                                                                                                                                                                                                                                                                                                                                                                                                                                                                                                                                                                                                                                                                                                                                                                                                                                                                                                                                                                                                                                                                                                                                                                                                                                                                                                                   | 5221855 |
| 114 | patient health questionnaire/ [Add-On Qualitative Studies Terms]                                                                                                                                                                                                                                                                                                                                                                                                                                                                                                                                                                                                                                                                                                                                                                                                                                                                                                                                                                                                                                                                                                                                                                                                                                                                                                                                                                                                                                                                                                                                                       | 6864    |
| 115 | or/112-114 [QUALITATIVE STUDIES & SURVEYS OR QUESTIONNAIRES]                                                                                                                                                                                                                                                                                                                                                                                                                                                                                                                                                                                                                                                                                                                                                                                                                                                                                                                                                                                                                                                                                                                                                                                                                                                                                                                                                                                                                                                                                                                                                           | 8070739 |
| 116 | 94 and 115                                                                                                                                                                                                                                                                                                                                                                                                                                                                                                                                                                                                                                                                                                                                                                                                                                                                                                                                                                                                                                                                                                                                                                                                                                                                                                                                                                                                                                                                                                                                                                                                             | 5679    |
| 117 | 93 or 100 or 105 or 111 or 116                                                                                                                                                                                                                                                                                                                                                                                                                                                                                                                                                                                                                                                                                                                                                                                                                                                                                                                                                                                                                                                                                                                                                                                                                                                                                                                                                                                                                                                                                                                                                                                         | 26723   |

|            |                                                                                                                                                                                                                                             |              |
|------------|---------------------------------------------------------------------------------------------------------------------------------------------------------------------------------------------------------------------------------------------|--------------|
| 118        | (exp animal/ or exp animal experimentation/ or exp animal model/ or exp animal experiment/ or nonhuman/ or exp vertebrate/) not (exp human/ or exp human experimentation/ or exp human experiment/) [ANIMAL STUDIES ONLY - REMOVE - EMBASE] | 13475579     |
| 119        | (exp adolescent/ or exp child/ or exp infant/) not (exp adult/ and (exp adolescent/ or exp child/ or exp infant/)) [CHILDREN <18 REMOVED]                                                                                                   | 6578477      |
| 120        | (editorial or note or short survey or tombstone).pt. or (letter.pt. not randomized controlled trial/) [OPINION PIECES REMOVE - Embase]                                                                                                      | 6515208      |
| 121        | 117 not (118 or 119 or 120) [ANIMAL STUDIES, CHILDREN <18 and OPINION PUBLICATIONS - REMOVED - Embase]                                                                                                                                      | 24835        |
| 122        | conference abstract.pt.                                                                                                                                                                                                                     | 5119841      |
| 123        | 121 and 122 [CONFERENCE ABSTRACTS ONLY]                                                                                                                                                                                                     | 4638         |
| 124        | limit 123 to yr="2022 -Current"                                                                                                                                                                                                             | 622          |
| 125        | 121 not 122 [CONFERENCE ABSTRACTS REMOVED]                                                                                                                                                                                                  | 20197        |
| 126        | 124 or 125 [LAST 2 YRS OF ABSTRACTS RETAINED]                                                                                                                                                                                               | 20819        |
| 127        | limit 126 to yr="2000 -Current"                                                                                                                                                                                                             | 18408        |
| 128        | limit 127 to english language                                                                                                                                                                                                               | 17211        |
| 129        | 128 use emczd [Embase results]                                                                                                                                                                                                              | 6231         |
| 130        | 61 or 62 or 129 [MEDLINE, Healthstar & Embase results]                                                                                                                                                                                      | 18001        |
| 131        | limit 130 to yr="2021-Current" [DEDUPLICATION SET #1]                                                                                                                                                                                       | 4754         |
| 132        | limit 130 to yr="2015-2020" [DEDUPLICATION SET #2]                                                                                                                                                                                          | 5729         |
| 133        | limit 130 to yr="2006-2014" [DEDUPLICATION SET #3]                                                                                                                                                                                          | 5494         |
| 134        | limit 130 to yr="2000-2005" [DEDUPLICATION SET #4]                                                                                                                                                                                          | 2024         |
| 135        | remove duplicates from 131                                                                                                                                                                                                                  | 3022         |
| 136        | remove duplicates from 132                                                                                                                                                                                                                  | 3309         |
| 137        | remove duplicates from 133                                                                                                                                                                                                                  | 3264         |
| 138        | remove duplicates from 134                                                                                                                                                                                                                  | 1221         |
| <b>139</b> | <b>135 or 136 or 137 or 138</b>                                                                                                                                                                                                             | <b>10816</b> |
